# Supplementary material for: Tumor-derived circulating exosomal miR-342-5p and miR-574-5p as promising diagnostic biomarkers for early-stage Lung Adenocarcinoma
Source: PubMed Central journal article supplement (PMC7330662; doi:10.7150/ijms.43500), 2020-06-06
Supplement: ijmsv17p1428s1.pdf [file ijmsv17p1428s1.pdf]

# Tumor-derived Circulating Exosomal miR-342-5p And miR-574-5p As Novel Promising Diagnostic Biomarkers For Early-stage Lung Adenocarcinoma

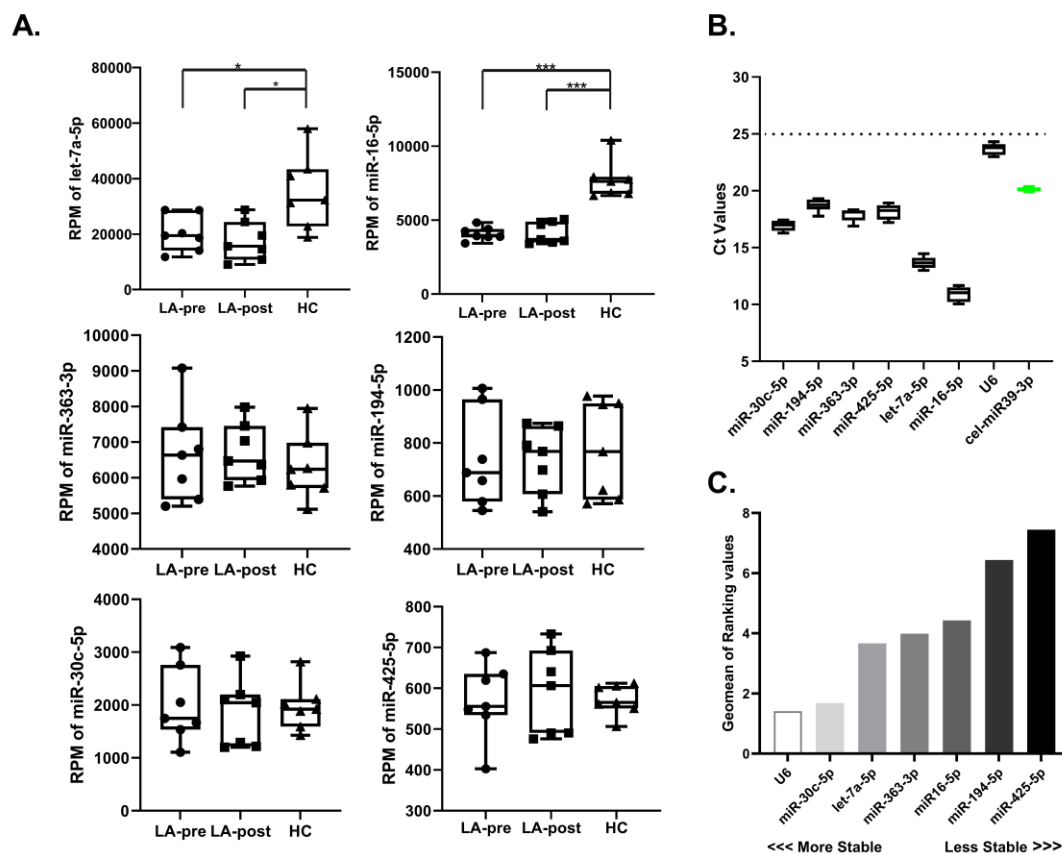

**Figure S1. Selection of stable internal reference.** (A) The expression level of selected six candidate reference miRNAs in sequencing data (\*P < 0.05, \*\*\*P < 0.001). (B) Ct values of tested candidate internal references. (C) Histogram showing stability of candidate internal references analyzed by RefFinder. The less the geomean of ranking value is, the more stable the internal reference is.

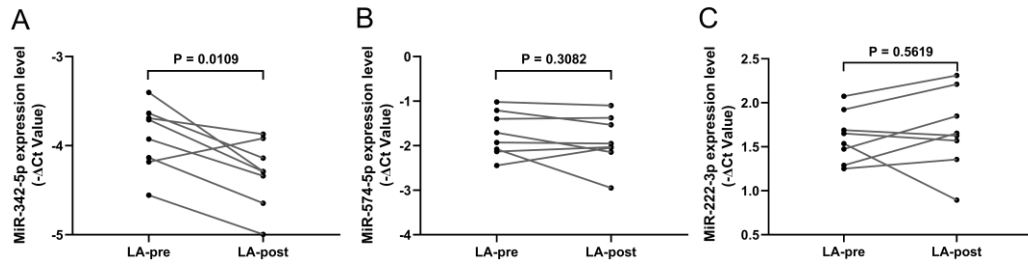

**Figure S2. RT-qPCR results of candidate miRNAs in advanced-stage LA patients.** Relative expression level of (A) miR-342-5p, (B) miR-574-5p and (C) miR-222-3p in paired LA-pre and LA-post (IIIA stage, n = 8). Statistical significance was analyzed by two-sided paired Student's *t*-test.

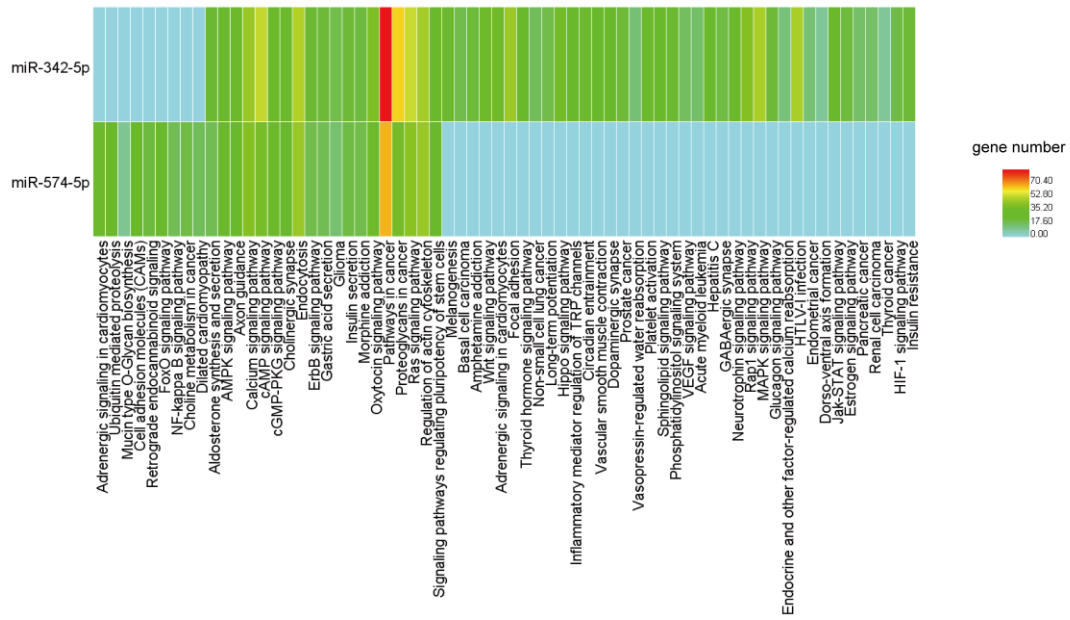

**Figure S3.** Heat map showing associated KEGG pathways of miR-342-5p and miR-574-5p predicted target genes.

**Table S1. Differentially expressed circulating exosomal miRNAs in LA-pre and HC**

| miRNA            | Average RPM of LA-pre | Average RPM of HC | FC      | Adjusted P-value |
|------------------|-----------------------|-------------------|---------|------------------|
| hsa-miR-144-5p   | 1249                  | 3065              | 0.4076  | <0.0001          |
| hsa-miR-574-5p   | 65.81                 | 2.43              | 27.0889 | <0.0001          |
| hsa-miR-103a-3p  | 2300                  | 9163              | 0.2511  | <0.0001          |
| hsa-miR-23a-3p   | 72.4                  | 202.7             | 0.3573  | <0.0001          |
| hsa-miR-27b-3p   | 239.4                 | 500.5             | 0.4783  | <0.0001          |
| hsa-miR-3912     | 2.909                 | 7.915             | 0.3676  | <0.0001          |
| hsa-miR-548k     | 6.987                 | 12.41             | 0.5630  | 0.0002           |
| hsa-miR-221-3p   | 94.43                 | 256.5             | 0.3681  | 0.0003           |
| hsa-miR-185-5p   | 3144                  | 9832              | 0.3198  | 0.0003           |
| hsa-miR-3140-3p  | 1.085                 | 2.134             | 0.5083  | 0.0004           |
| hsa-miR-548av-5p | 3.554                 | 8.737             | 0.4068  | 0.0004           |
| hsa-miR-451a     | 582925                | 386853            | 1.5068  | 0.0004           |
| hsa-miR-374b-3p  | 0.9535                | 2.872             | 0.3320  | 0.0004           |
| hsa-miR-17-5p    | 803.3                 | 1762              | 0.4559  | 0.0004           |
| hsa-miR-16-5p    | 4082                  | 7711              | 0.5294  | 0.0004           |
| hsa-miR-500a-3p  | 27.82                 | 65.06             | 0.4276  | 0.0004           |
| hsa-miR-484      | 323.9                 | 739.6             | 0.4380  | 0.0005           |
| hsa-miR-190a     | 5.522                 | 20.46             | 0.2699  | 0.0006           |
| hsa-let-7g-5p    | 30374                 | 57165             | 0.5313  | 0.0006           |
| hsa-miR-361-5p   | 12.08                 | 27.61             | 0.4376  | 0.0006           |
| hsa-miR-22-3p    | 1212                  | 3217              | 0.3767  | 0.0007           |
| hsa-miR-3158-3p  | 318.6                 | 161.8             | 1.9690  | 0.0008           |
| hsa-miR-548ay-5p | 23.6                  | 57.79             | 0.4084  | 0.0008           |
| hsa-miR-590-3p   | 7.487                 | 20.79             | 0.3601  | 0.0008           |
| hsa-miR-107      | 5.178                 | 25.84             | 0.2004  | 0.0008           |
| hsa-miR-93-5p    | 1111                  | 2901              | 0.3831  | 0.0008           |
| hsa-miR-502-3p   | 38.1                  | 117.3             | 0.3248  | 0.001            |
| hsa-miR-651      | 13.49                 | 40.7              | 0.3314  | 0.0011           |
| hsa-miR-1180     | 115                   | 62.77             | 1.8324  | 0.0011           |
| hsa-miR-598      | 12.61                 | 24.78             | 0.5090  | 0.0011           |
| hsa-miR-21-5p    | 4028                  | 9986              | 0.4033  | 0.0011           |
| hsa-miR-15a-5p   | 43.05                 | 111.4             | 0.3863  | 0.0013           |
| hsa-miR-150-5p   | 168.4                 | 304.7             | 0.5527  | 0.0013           |
| hsa-miR-1        | 1.069                 | 10.62             | 0.1006  | 0.0014           |
| hsa-miR-181a-5p  | 422.7                 | 857               | 0.4932  | 0.0015           |
| hsa-miR-146b-5p  | 406.4                 | 729.6             | 0.5570  | 0.0016           |
| hsa-miR-190b     | 2.52                  | 5.516             | 0.4568  | 0.0017           |
| hsa-miR-130b-3p  | 6.463                 | 13.77             | 0.4694  | 0.0017           |
| hsa-miR-378g     | 1.89                  | 4.011             | 0.4711  | 0.0017           |

|                  |        |       |        |        |
|------------------|--------|-------|--------|--------|
| hsa-miR-548at-5p | 0.6231 | 1.381 | 0.4511 | 0.002  |
| hsa-miR-148a-3p  | 13847  | 6404  | 2.1622 | 0.0021 |
| hsa-miR-339-3p   | 1.878  | 4.626 | 0.4061 | 0.0021 |
| hsa-miR-4521     | 1.852  | 5.017 | 0.3691 | 0.0022 |
| hsa-miR-199b-3p  | 37.41  | 114.3 | 0.3272 | 0.0022 |
| hsa-miR-4306     | 416.1  | 898.9 | 0.4629 | 0.0022 |
| hsa-miR-148b-3p  | 966.8  | 1765  | 0.5479 | 0.0023 |
| hsa-miR-30e-5p   | 766.9  | 3138  | 0.2444 | 0.0025 |
| hsa-miR-659-5p   | 7.024  | 3.745 | 1.8757 | 0.0025 |
| hsa-miR-340-3p   | 38.13  | 16.06 | 2.3743 | 0.0025 |
| hsa-miR-221-5p   | 6.485  | 14.91 | 0.4350 | 0.0027 |
| hsa-miR-421      | 24.76  | 43.07 | 0.5750 | 0.0027 |
| hsa-miR-20a-5p   | 1235   | 2942  | 0.4198 | 0.0032 |
| hsa-miR-152      | 23.08  | 47.05 | 0.4904 | 0.0032 |
| hsa-miR-199b-5p  | 6.704  | 18.64 | 0.3597 | 0.0032 |
| hsa-miR-185-3p   | 51.02  | 104.9 | 0.4866 | 0.0033 |
| hsa-miR-20b-5p   | 275.5  | 545.2 | 0.5054 | 0.0034 |
| hsa-miR-126-5p   | 100.3  | 385.9 | 0.2598 | 0.0034 |
| hsa-miR-342-3p   | 15.39  | 32.09 | 0.4795 | 0.0034 |
| hsa-miR-374a-3p  | 34.29  | 95.27 | 0.3599 | 0.0037 |
| hsa-miR-106b-5p  | 272.1  | 818.4 | 0.3325 | 0.004  |
| hsa-miR-378a-3p  | 380.6  | 715.6 | 0.5318 | 0.004  |
| hsa-let-7f-5p    | 31855  | 61073 | 0.5216 | 0.004  |
| hsa-miR-576-3p   | 12.1   | 35.17 | 0.3442 | 0.0043 |
| hsa-miR-98-5p    | 504.5  | 822.3 | 0.6135 | 0.0043 |
| hsa-miR-106a-5p  | 82.76  | 174.5 | 0.4742 | 0.0045 |
| hsa-miR-362-5p   | 9.323  | 13.76 | 0.6776 | 0.0051 |
| hsa-miR-330-5p   | 10.98  | 6.599 | 1.6643 | 0.0051 |
| hsa-miR-374a-5p  | 362.3  | 724.6 | 0.5000 | 0.0055 |
| hsa-miR-660-5p   | 65.09  | 178.3 | 0.3650 | 0.0061 |
| hsa-miR-26b-3p   | 3.851  | 6.934 | 0.5554 | 0.0063 |
| hsa-miR-652-3p   | 448.6  | 707.2 | 0.6343 | 0.0063 |
| hsa-miR-532-5p   | 748.5  | 1230  | 0.6085 | 0.0063 |
| hsa-miR-186-5p   | 1402   | 2844  | 0.4928 | 0.0063 |
| hsa-miR-454-3p   | 151.7  | 274   | 0.5535 | 0.0063 |
| hsa-miR-200c-3p  | 7.307  | 12.72 | 0.5744 | 0.0068 |
| hsa-miR-548e     | 5.097  | 10.18 | 0.5009 | 0.0068 |
| hsa-miR-93-3p    | 18.12  | 34.45 | 0.5260 | 0.0068 |
| hsa-miR-29b-2-5p | 1.906  | 3.901 | 0.4886 | 0.0071 |
| hsa-miR-324-3p   | 38.48  | 67.24 | 0.5722 | 0.0078 |
| hsa-let-7d-5p    | 2482   | 5901  | 0.4205 | 0.0094 |
| hsa-miR-340-5p   | 81.04  | 322.4 | 0.2513 | 0.0096 |
| hsa-miR-210      | 28.87  | 58.83 | 0.4908 | 0.0097 |

|                  |        |       |        |        |
|------------------|--------|-------|--------|--------|
| hsa-miR-101-3p   | 5838   | 14426 | 0.4047 | 0.0097 |
| hsa-miR-146a-5p  | 306    | 707.6 | 0.4325 | 0.0097 |
| hsa-miR-26a-5p   | 12902  | 23324 | 0.5532 | 0.0097 |
| hsa-miR-624-5p   | 5.307  | 10.52 | 0.5045 | 0.0097 |
| hsa-miR-21-3p    | 3.81   | 9.409 | 0.4049 | 0.0101 |
| hsa-miR-184      | 2.856  | 1.143 | 2.4996 | 0.0104 |
| hsa-miR-16-2-3p  | 41.1   | 19.93 | 2.0626 | 0.0104 |
| hsa-miR-151a-3p  | 3724   | 2472  | 1.5065 | 0.0104 |
| hsa-miR-342-5p   | 56.43  | 29.16 | 1.9353 | 0.0104 |
| hsa-miR-18a-5p   | 23.81  | 42.06 | 0.5662 | 0.0104 |
| hsa-miR-28-3p    | 36.51  | 63.39 | 0.5760 | 0.0104 |
| hsa-miR-19a-3p   | 59.26  | 147.3 | 0.4024 | 0.0104 |
| hsa-miR-4446-3p  | 0.4439 | 1.055 | 0.4207 | 0.0107 |
| hsa-miR-548ah-3p | 1.012  | 2.227 | 0.4546 | 0.0109 |
| hsa-miR-450b-5p  | 4.15   | 12.84 | 0.3233 | 0.0109 |
| hsa-let-7c       | 75.43  | 141.9 | 0.5316 | 0.0113 |
| hsa-miR-378f     | 1.126  | 2.861 | 0.3937 | 0.0115 |
| hsa-miR-144-3p   | 1026   | 4040  | 0.2539 | 0.0119 |
| hsa-miR-766-3p   | 1.879  | 3.224 | 0.5827 | 0.0122 |
| hsa-miR-425-3p   | 6.894  | 13.34 | 0.5169 | 0.0122 |
| hsa-miR-130a-3p  | 24.14  | 38.51 | 0.6268 | 0.0122 |
| hsa-miR-939-5p   | 2.383  | 3.521 | 0.6769 | 0.0124 |
| hsa-miR-29a-3p   | 34.09  | 80.27 | 0.4247 | 0.0133 |
| hsa-miR-140-3p   | 1938   | 3451  | 0.5615 | 0.0133 |
| hsa-miR-4286     | 2.383  | 6.872 | 0.3468 | 0.0145 |
| hsa-miR-19b-3p   | 115.4  | 490.5 | 0.2352 | 0.0146 |
| hsa-miR-142-5p   | 119.6  | 467.6 | 0.2557 | 0.0155 |
| hsa-miR-18b-5p   | 0.483  | 1.08  | 0.4472 | 0.0155 |
| hsa-miR-99a-5p   | 149.4  | 90.92 | 1.6438 | 0.0158 |
| hsa-miR-664a-5p  | 2.099  | 3.346 | 0.6273 | 0.0158 |
| hsa-miR-374b-5p  | 411.2  | 712.4 | 0.5772 | 0.0163 |
| hsa-miR-3656     | 7.603  | 2.503 | 3.0374 | 0.0179 |
| hsa-miR-581      | 5.833  | 3.962 | 1.4723 | 0.0195 |
| hsa-miR-1273c    | 0.8208 | 1.921 | 0.4274 | 0.0202 |
| hsa-miR-1306-3p  | 6.353  | 2.813 | 2.2582 | 0.021  |
| hsa-miR-320b     | 107.1  | 167.7 | 0.6388 | 0.0217 |
| hsa-miR-25-5p    | 7.745  | 13.8  | 0.5613 | 0.0221 |
| hsa-miR-1976     | 8.176  | 12.36 | 0.6613 | 0.0227 |
| hsa-miR-222-3p   | 415.8  | 237.9 | 1.7475 | 0.0229 |
| hsa-let-7e-5p    | 8.268  | 18.58 | 0.4450 | 0.0237 |
| hsa-miR-3200-5p  | 3.545  | 7.401 | 0.4791 | 0.0239 |
| hsa-miR-155-5p   | 51.13  | 73.21 | 0.6984 | 0.0239 |
| hsa-miR-1255b-5p | 46.88  | 29.89 | 1.5684 | 0.0256 |

|                 |        |        |        |        |
|-----------------|--------|--------|--------|--------|
| hsa-let-7i-3p   | 7.251  | 12.53  | 0.5787 | 0.0259 |
| hsa-miR-106b-3p | 237.9  | 340.8  | 0.6982 | 0.0265 |
| hsa-miR-181c-5p | 2.889  | 5.39   | 0.5360 | 0.0265 |
| hsa-miR-3173-5p | 0.9002 | 1.996  | 0.4509 | 0.027  |
| hsa-miR-3176    | 1.037  | 3.032  | 0.3419 | 0.027  |
| hsa-miR-224-5p  | 1.952  | 5.105  | 0.3823 | 0.027  |
| hsa-miR-17-3p   | 7.03   | 10.92  | 0.6437 | 0.027  |
| hsa-miR-301a-3p | 0.7206 | 2.258  | 0.3191 | 0.0289 |
| hsa-miR-532-3p  | 7.676  | 13.07  | 0.5872 | 0.0295 |
| hsa-miR-5582-3p | 2.165  | 0.8586 | 2.5216 | 0.0301 |
| hsa-miR-335-5p  | 6.095  | 12.95  | 0.4708 | 0.0341 |
| hsa-miR-450a-5p | 12.77  | 24.99  | 0.5111 | 0.0352 |
| hsa-miR-181d    | 1.88   | 3.236  | 0.5808 | 0.0368 |
| hsa-miR-3200-3p | 13.64  | 24.22  | 0.5629 | 0.0368 |
| hsa-miR-1288    | 0.9254 | 0.4983 | 1.8571 | 0.038  |
| hsa-miR-15b-5p  | 186.8  | 360.2  | 0.5185 | 0.038  |
| hsa-miR-135a-5p | 1.727  | 3.128  | 0.5521 | 0.0384 |
| hsa-miR-501-3p  | 30.44  | 54.58  | 0.5577 | 0.0384 |
| hsa-miR-29c-3p  | 16.1   | 30.14  | 0.5342 | 0.0384 |
| hsa-miR-514a-3p | 1.791  | 0.8799 | 2.0356 | 0.0394 |
| hsa-miR-1307-5p | 1.836  | 10.97  | 0.1673 | 0.0398 |
| hsa-let-7i-5p   | 69571  | 87935  | 0.7912 | 0.0398 |
| hsa-miR-30e-3p  | 552    | 739.4  | 0.7466 | 0.0405 |
| hsa-miR-24-3p   | 521.3  | 413.6  | 1.2604 | 0.0405 |
| hsa-miR-548o-3p | 8.131  | 11.58  | 0.7021 | 0.0405 |
| hsa-miR-345-5p  | 22.68  | 40.31  | 0.5626 | 0.0405 |
| hsa-miR-5001-3p | 1.642  | 2.311  | 0.7104 | 0.0414 |
| hsa-miR-132-3p  | 5.75   | 8.913  | 0.6452 | 0.042  |
| hsa-miR-874     | 0.7498 | 2.044  | 0.3668 | 0.0435 |
| hsa-let-7a-3p   | 74.96  | 115.7  | 0.6477 | 0.0444 |
| hsa-miR-454-5p  | 12.79  | 17.83  | 0.7170 | 0.0466 |
| hsa-miR-941     | 79.2   | 170.6  | 0.4643 | 0.0487 |
| hsa-miR-28-5p   | 11.33  | 17.65  | 0.6421 | 0.0488 |
| hsa-let-7a-5p   | 20236  | 35337  | 0.5727 | 0.0489 |

**Table S2. Average Ct values of candidate biomarkers detected in validation samples**

| miRNA          | Mean $\pm$ SD (Ct) |                  |                  |
|----------------|--------------------|------------------|------------------|
|                | LA-pre(n=56)       | LA-post(n=51)    | HC (n=40)        |
| hsa-miR-342-5p | 25.96 $\pm$ 0.90   | 26.66 $\pm$ 0.97 | 26.64 $\pm$ 0.98 |
| hsa-miR-574-5p | 23.41 $\pm$ 0.89   | 23.87 $\pm$ 0.92 | 24.47 $\pm$ 0.87 |
| hsa-miR-222-3p | 20.35 $\pm$ 1.16   | 20.76 $\pm$ 1.36 | 21.24 $\pm$ 0.99 |
| RNU6           | 22.23 $\pm$ 1.09   | 22.52 $\pm$ 1.18 | 22.47 $\pm$ 1.05 |
